# Supplementary material
Source: PubMed Central journal article supplement (PMC8845067)
Supplement: NIHMS1575000-supplement-1.pdf [file NIHMS1575000-supplement-1.pdf]

**Supplemental Table 1:**

| <b>Gene</b> | <b>ID</b> | <b>MIM</b> | <b>Location</b> |
|-------------|-----------|------------|-----------------|
| GPX1        | 2876      | 138320     | 3p21.31         |
| GPX2        | 2877      | 138319     | 14q23.3         |
| GPX3        | 2878      | 138321     | 5q33.1          |
| GPX4        | 2879      | 138322     | 19p13.3         |
| GPX6        | 257202    | 607913     | 6p22.1          |
| TXNRD1      | 7296      | 601112     | 12q23.3         |
| TXNRD2      | 10587     | 606448     | 22q11.21        |
| TXNRD3      | 114112    | 606235     | 3q21.3          |
| DIO1        | 1733      | 147892     | 1p32.3          |
| DIO2        | 1734      | 601413     | 14q31.1         |
| DIO3        | 1735      | 601038     | 14q32.31        |
| SEPHS1      | 22929     | 600902     | 10p13           |
| SEPHS2      | 22928     | 606218     | 16p11.2         |
| SEPS1       | 55829     | 607918     | 15q26.3         |
| SEPP1       | 6414      | 601484     | 5p12            |
| SEP15       | 9403      | 606254     | 1p22.3          |

|         |        |        |          |
|---------|--------|--------|----------|
| SEPN1   | 57190  | 606210 | 1p36.11  |
| SEPX1   | 51734  | 606216 | 16p13.3  |
| SEPW1   | 6415   | 603235 | 19q13.33 |
| SEPT1   | 1731   | 612897 | 16p11.2  |
| SELH    | 280636 | 607914 | 11q12.1  |
| SELI    | 85465  | 607915 | 2p23.3   |
| SELK    | 58515  | 607916 | 3p21.1   |
| SELM    | 140606 | 610918 | 22q12.2  |
| SELO    | 83642  | 607917 | 22q13.33 |
| SELV    | 348303 | 607919 | 19q13.2  |
| GLCL    | 2729   | 606857 | 6p12.1   |
| GCLM    | 2730   | 601176 | 1p22.1   |
| SEPSECS | 51091  | 613009 | 4p15.2   |

**Supplemental Table 2** : Variants with unadjusted p < 0.05 by glioma subtype in GliomaSE cohort

| Gene    | Variant     | GBM  |              |             | nonGBM |             |             |
|---------|-------------|------|--------------|-------------|--------|-------------|-------------|
|         |             | OR   | (95% CI)     | p-value     | OR     | (95% CI)    | p-value     |
| TXNRD1  | rs12308914  | 0.76 | (0.58-0.98)  | <b>0.03</b> | 1.39   | (1.07-1.82) | <b>0.01</b> |
|         | rs78730305  | 0.73 | (0.57-0.96)  | <b>0.02</b> | 1.38   | (1.04-1.82) | <b>0.02</b> |
|         | rs17807362  | 1.07 | (0.84-1.36)  | 0.56        | 0.69   | (0.51-0.94) | <b>0.02</b> |
|         | rs111111953 | 1.06 | (0.94-1.18)  | 0.35        | 0.88   | (0.77-1.00) | <b>0.04</b> |
|         | rs10778311  | 0.94 | (0.83-1.06)  | 0.31        | 1.17   | (1.01-1.34) | <b>0.03</b> |
|         | rs112780531 | 0.88 | (0.66-1.16)  | 0.35        | 1.4    | (1.05-1.87) | <b>0.02</b> |
| TXNRD2  | rs1548357   | 0.86 | (0.76-0.98)  | <b>0.02</b> | 1.05   | (0.91-1.20) | 0.55        |
|         | rs2073771   | 0.87 | (0.78-0.99)  | <b>0.03</b> | 1.03   | (0.90-1.18) | 0.68        |
|         | rs1978058   | 1.13 | (1.01-1.27)  | <b>0.03</b> | 1.03   | (0.90-1.17) | 0.72        |
|         | rs5993875   | 1.15 | (1.02-1.29)  | <b>0.02</b> | 0.95   | (0.84-1.09) | 0.48        |
|         | rs5748486   | 1.16 | (1.03-1.30)  | <b>0.01</b> | 0.94   | (0.82-1.07) | 0.34        |
| SEPHS1  | rs61865660  | 1.15 | (1.00-1.32)  | <b>0.05</b> | 0.93   | (0.80-1.09) | 0.4         |
|         | rs9419275   | 0.79 | (0.65-0.970) | <b>0.02</b> | 1.1    | (0.88-1.36) | 0.41        |
|         | rs11250389  | 0.96 | (0.79-1.16)  | 0.66        | 0.77   | (0.61-0.97) | <b>0.03</b> |
|         | rs9419313   | 1.01 | (0.89-1.16)  | 0.84        | 1.17   | (1.01-1.36) | <b>0.04</b> |
| SEPX1   | rs13331553  | 1.17 | (1.03-1.32)  | <b>0.02</b> | 1      | (0.87-1.15) | 0.98        |
| SEPSECS | rs3796791   | 1.06 | (0.94-1.19)  | 0.37        | 0.86   | (0.75-0.98) | <b>0.02</b> |
| SELI    | rs62128670  | 1.05 | (0.81-1.36)  | 0.73        | 0.62   | (0.44-0.87) | <b>0.01</b> |
| GPX2    | rs17880758  | 0.87 | (0.66-1.15)  | 0.33        | 1.35   | (1.01-1.79) | <b>0.04</b> |
